# Supplementary material for: Fabrication of Durable Superhydrophobic Surface for Versatile Oil/Water Separation Based on HDTMS Modified PPy/ZnO
Source: MDPI journal article supplement (doi:10.3390/nano12142510), 2022-07-21
Supplement: s1 [file s1]

## **Fabrication of durable superhydrophobic surface for versatile oil/water separation based on HDTMS modified PPy/ZnO**

Shumin Fan<sup>\*1,2,3</sup>, Sujie Jiang<sup>3</sup>, Zhenjie Wang<sup>3</sup>, Pengchao Liang<sup>3</sup>, Wenxiu Fan<sup>3</sup>, Kelei Zhuo<sup>\*4</sup>, Guangri Xu<sup>\*3</sup>

<sup>1</sup>Postdoctoral Research Base, Henan Institute of Science and Technology, Xinxiang 453003, Henan, China

<sup>2</sup>Postdoctoral Research Station of Chemistry, Henan Normal University, Xinxiang 453007, Henan, China

<sup>3</sup>School of Chemistry and Chemical Engineering, Henan Institute of Science and Technology, Xinxiang 453003, Henan, China

<sup>4</sup>School of Chemistry and Chemical Engineering, Henan Normal University, Xinxiang 453007, Henan, China

E-mail address: fansm88@hotmail.com (Shumin Fan); [kzhuo@htu.cn](mailto:kzhuo@htu.cn) (Kelei Zhuo); [xugr70@163.com](mailto:xugr70@163.com) (Guangri Xu)

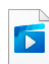

tetrachloromethane and water.mp4

Video S1. Separation of tetrachloromethane/water mixture with coated fabric

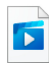

petroleum ether and water.mp4

Video S2. Separation of petroleum ether/water mixture with coated fabric

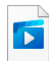

emulsion separation.mp4

Video S3. Separation of water-in-tetrachloromethane emulsion with coated fabric
