# Supplementary material for: Fabrication of Durable Superhydrophobic Surface for Versatile Oil/Water Separation Based on HDTMS Modified PPy/ZnO
Source: Nanomaterials (Basel). 2022 Jul 21;12(14):2510. doi: 10.3390/nano12142510 (PMC9322026; doi:10.3390/nano12142510)
Supplement: Supplementary file 1 [file nanomaterials-12-02510-s001.zip]

Archive with 4 entries (4 files):
- nanomaterials-1805797-supplementary.pdf
- Video S1.mp4
- Video S2.mp4
- Video S3.mp4
